# Supplementary material for: How to Choose the Biologic Therapy in a Bio-naïve Patient with Inflammatory Bowel Disease
Source: MDPI journal article supplement (doi:10.3390/jcm11030829), 2022-02-04
Supplement: s1 [file s1]

**Table S1.** Randomized placebo-controlled trials of biologic therapy in moderate-severe ulcerative colitis.

| Study (year)             | Biological drug | Patients              | Sample size                            | Follow up                                     | Main results.                                                                                                                                                                                                                                                                                                                                | Conclusion                 |
|--------------------------|-----------------|-----------------------|----------------------------------------|-----------------------------------------------|----------------------------------------------------------------------------------------------------------------------------------------------------------------------------------------------------------------------------------------------------------------------------------------------------------------------------------------------|----------------------------|
| ACT 1 and 2 (2005) [156] | IFX             | Anti-TNFs naïve       | 364 patients                           | ACT 1: 54 weeks<br>ACT 2: 30 weeks            | <i>Clinical response at week 8:</i><br>ACT 1: 69% IFX 5 mg vs 61% IFX 10 mg vs 37% placebo; p <0.001<br><br>ACT 2: 64% IFX 5 mg vs 69% IFX 10 mg vs 29% placebo; p <0.001<br><br><i>Clinical response at week 54:</i><br>ACT 1: 45% IFX 5 mg vs 44% IFX 10 mg vs 20% placebo; p <0.001                                                       | IFX is superior to placebo |
| ULTRA 1 (2011) [79]      | ADA             | Anti-TNFs naïve       | 390 patients                           | ULTRA 1: 8 weeks                              | <i>Clinical remission at week 8:</i> 18.5% ADA vs 9.2% placebo; p =0.031<br><i>Clinical remission in bio-naïve at week 8:</i> 21.3% ADA vs 11% placebo; p =0.017                                                                                                                                                                             | ADA is superior to placebo |
| ULTRA 2 (2012) [157]     |                 | 59.7% anti-TNFs naïve | 494 patients                           | ULTRA 2: 52 weeks                             | <i>Clinical remission in bio-naïve at week 52:</i> 22% ADA vs 12.4% placebo; p =0.029                                                                                                                                                                                                                                                        |                            |
| PURSUIT (2014) [158,159] | GOL             | Anti-TNFs naïve       | 774 patients (phase 3)<br>464 patients | 6 weeks (induction)<br>54 weeks (maintenance) | <i>Clinical response at week 6:</i> 51.8% GOL 200/100 mg vs 29.7% placebo; p <0.0001<br><br><i>Clinical response at week 54:</i> 47.0% GOL 50 mg vs 49.7% GOL 100 mg vs 31.2% placebo; p =0.010 and p <0.001<br><br><i>Clinical remission and mucosal healing at week 54:</i> 41.7% GOL 50 mg vs 42.4% GOL 100 mg vs 26.6% placebo; p =0.002 | GOL is superior to placebo |
| GEMINI (2013) [160]      | VDZ             | 51.8% anti-TNFs naïve | 895 patients                           | 52 weeks                                      | <i>Clinical response at week 6:</i> 47.1% VDZ vs 25.5% placebo (p<0.001)<br><i>Clinical remission at week 52:</i> 41.8% VDZ vs 15.9% placebo; p<0.001                                                                                                                                                                                        | VDZ is superior to placebo |
| UNIFI (2019) [47]        | UST             | 46.1% anti-TNFs naïve | 961 patients                           | 44 weeks                                      | <i>Clinical remission at week 8:</i> 15.5% UST vs 5.3% placebo; p<0.001<br><i>Clinical remission at week 44:</i> 38.4% UST/12 weeks vs 43.8% UST/8weeks vs 24% placebo; p=0.002 and p<0.001                                                                                                                                                  | UST is superior to placebo |
